# Supplementary material for: Distinct and Shared Determinants of Cardiomyocyte Contractility in Multi-Lineage Competent Ethnically Diverse Human iPSCs
Source: PubMed Central journal article supplement (PMC5137163; doi:10.1038/srep37637), 2016-12-05

**Distinct and Shared Determinants of Cardiomyocyte  
Contractility in Multi-Lineage Competent  
Ethnically Diverse Human iPSCs**

Martin L. Tomov, Zachary T. Olmsted, Haluk Dogan, Eda Gongorurler,  
Maria Tsompana, Hasan H. Otu, Michael Buck, Eun-Ah Chang, Jose Cibelli and Janet  
L. Paluh

## Supplementary Figures Legends

**Supplementary Table 1.** List of differentially expressed genes. Row *i*, column *j* represents genes up-regulated in sample "*j*" compared to sample "*i*".

### **Supplementary Figure S1. ED-iPSC lines differentiation protocols.**

Detailed protocol outlines used to generate **(a)** astrocytes, **(b)** pyramidal neurons, **(c)** retinal pigment epithelial (RPE) cells, **(d)** pancreatic progenitors, **(e)** smooth muscle cells, and **(f)** cardiomyocytes, either using the standard protocol, or the ED-iPSC optimized one.

### **Supplementary Figure S2. RNA-Seq average read Counts and quality of ED-iPSCs raw data.**

Analysis of ED-iPSC read counts and raw output show high quality RNA-Seq data.

### **Supplementary Data File 1. Differentially expressed gene list.**

Differentially expressed genes in fibroblast parent lines compared to ED-iPSCs, ED-iPSCs vs. initial fibroblasts, and contractile vs. non-contractile ED-iPSC biological replicates.

### **Supplementary Data File 2. GO and pathway lists.**

Full list of differentially expressed GO terms and pathways in the ED-iPSC replicate lines.

**Supplementary Movie 1: Mixed cardiomyocyte culture with contractile and non-contractile regions.**

H9 hESC derived cardiomyocytes grown on Matrigel coated dish show random non-contractile 2D regions and contractile 3D self-assembled regions within the same culture by day 15. Movie is at 1X speed, phase acquisition.

**Supplementary Movie 2: Multi-well array of aggregated contractile cardiomyocytes.**

High density seeded H9 hESC 2D culture derived cardiomyocytes were dissociated into single cells and seeded within the microwell array. Cells form 3D contractile clusters when allowed to self-assemble within patterned microwells by day 5. Movie is at 1X speed, phase acquisition. Well diameter is 200  $\mu\text{m}$ . Contractile clusters we observed in 396/400 wells in three separate experiments.

**Supplementary Movie 3: Zoom-in of multi-well array of aggregated contractile cardiomyocytes.**

High density seeded H9 hESC 2D culture derived cardiomyocytes were dissociated into single cells and seeded within the microwell array. The cells preferentially form 3D contractile clusters compared to inter-well areas, when allowed to self-assemble within patterned microwells by day 5. Movie is at 1X speed, phase acquisition. Well diameter is 200  $\mu\text{m}$ . Contractile clusters we observed in 790/800 wells spread over three separate experiments.

**Supplementary Movie 4: Aggregated cardiomyocytes contract in microwell arrays.**

2D culture F3.5.2 derived cardiomyocytes were dissociated into single cells and loaded into a microwell array. Cells preferentially self-assemble into contractile 3D clusters in templated wells within 5 days. Movie is at 1X speed, phase acquisition. Well diameter is 200  $\mu\text{m}$ .

**Supplementary Table 1.** List of differentially expressed genes. Row *i*, column *j* represents genes up-regulated in sample "*j*" compared to sample "*i*".

|        | A2   | A3   | F3   | H3   | A2.1.1 | A2.2.2 | A3.1.1 | A3.3.1 | F3.5.2 | F3.6.1 | H3.1.1 | H3.3.1 |
|--------|------|------|------|------|--------|--------|--------|--------|--------|--------|--------|--------|
| A2     |      | 446  | 578  | 665  | 2122   | 2617   |        |        |        |        |        |        |
| A3     | 536  |      | 204  | 586  |        |        | 2199   | 2584   |        |        |        |        |
| F3     | 569  | 241  |      | 564  |        |        |        |        | 2174   | 2026   |        |        |
| H3     | 892  | 795  | 793  |      |        |        |        |        |        |        | 2637   | 2664   |
| A2.1.1 | 2431 |      |      |      |        | 384    |        |        |        |        |        |        |
| A2.2.2 | 2106 |      |      |      | 128    |        | 282    |        | 87     |        | 2154   |        |
| A3.1.1 |      | 2382 |      |      | 481    |        |        |        | 109    |        | 697    |        |
| A3.3.1 |      | 1782 |      |      |        |        |        |        |        |        |        |        |
| F3.5.2 |      |      | 2159 |      | 242    |        | 170    |        |        |        | 702    |        |
| F3.6.1 |      |      | 1727 |      |        |        |        |        |        |        |        |        |
| H3.1.1 |      |      |      | 1777 | 1882   |        | 377    |        | 226    |        |        | 565    |
| H3.3.1 |      |      |      | 1767 |        |        |        |        |        |        |        | 460    |

## Supplementary Figure S1, Tomov et al., 2016

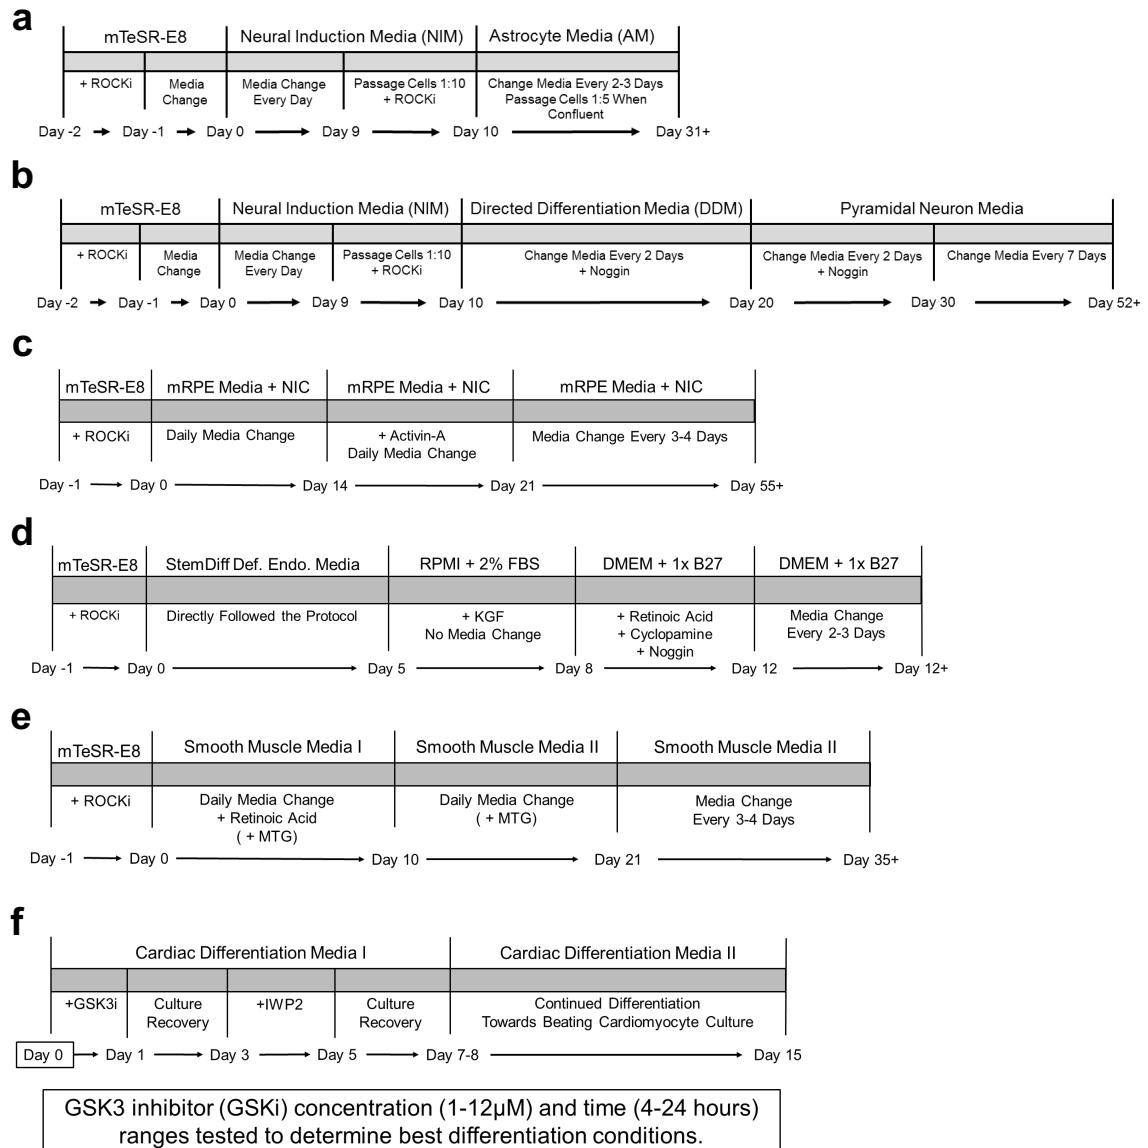

## Supplementary Figure S2, Tomov et al., 2016

**a**

| Internal ID | RAW          | Adapter Cleaned and Quality | RAW        |             |                |               | Adapter Cleaned and Quality Filtered |             |                |               |
|-------------|--------------|-----------------------------|------------|-------------|----------------|---------------|--------------------------------------|-------------|----------------|---------------|
|             | Read Number  |                             | Base Pair  |             |                |               |                                      |             |                |               |
|             | Pair 1       | Pair 1                      | Pair 1     | Avg. Read L | Pair 1 Q >= 25 | %High Quality | Pair 1                               | Avg. Read L | Pair 1 Q >= 25 | %High Quality |
| A2          | 31029390     | 31017103                    | 1582498890 | 51          | 1558816472     | 98.503        | 1542960933                           | 49.745      | 1526165683     | 98.911        |
| A2-1-1      | 32958431     | 32797882                    | 1680879981 | 51          | 1636397206     | 97.354        | 1625900520                           | 49.573      | 1594245302     | 98.053        |
| A2-2-2      | 40239117     | 40209471                    | 2052194967 | 51          | 1997615263     | 97.340        | 1993004965                           | 49.566      | 1953793458     | 98.033        |
| A3          | 27747546     | 27737279                    | 1415124846 | 51          | 1395084863     | 98.584        | 1380254250                           | 49.762      | 1365977936     | 98.966        |
| A3-1-1      | 31487964     | 31381523                    | 1605886164 | 51          | 1563110855     | 97.336        | 1555319470                           | 49.562      | 1524922165     | 98.046        |
| A3-3-1      | 50236778     | 50199809                    | 2562075678 | 51          | 2494815251     | 97.375        | 2488364516                           | 49.569      | 2440198052     | 98.064        |
| F3          | 22671797     | 22662955                    | 1156261647 | 51          | 1139690980     | 98.567        | 1127667203                           | 49.758      | 1115896687     | 98.956        |
| F3-5-2      | 50417664     | 50350752                    | 2571300864 | 51          | 2475643127     | 96.280        | 2485527946                           | 49.364      | 2417730252     | 97.272        |
| F3-6-1      | 43614053     | 43445144                    | 2224316703 | 51          | 2142163924     | 96.307        | 2144590146                           | 49.363      | 2086183502     | 97.277        |
| H3          | 28837478     | 28249045                    | 1470711378 | 51          | 1450673205     | 98.638        | 1289442517                           | 45.646      | 1281913440     | 99.416        |
| H3-1-1      | 39526078     | 39337609                    | 2015829978 | 51          | 1938890671     | 96.183        | 1941077594                           | 49.344      | 1886157677     | 97.171        |
| H3-3-1      | 43463804     | 43418156                    | 2216654004 | 51          | 2133812239     | 96.263        | 2142710414                           | 49.351      | 2083912084     | 97.256        |
| Average     | 36852508.333 | 36733894.000                | 1879477925 |             |                |               | 97.394                               | 1809735040  |                | 98.118        |
| StDev       | 9031668.717  | 9060773.218                 |            |             |                | 0.988407284   |                                      |             |                | 0.787366744   |

**b**

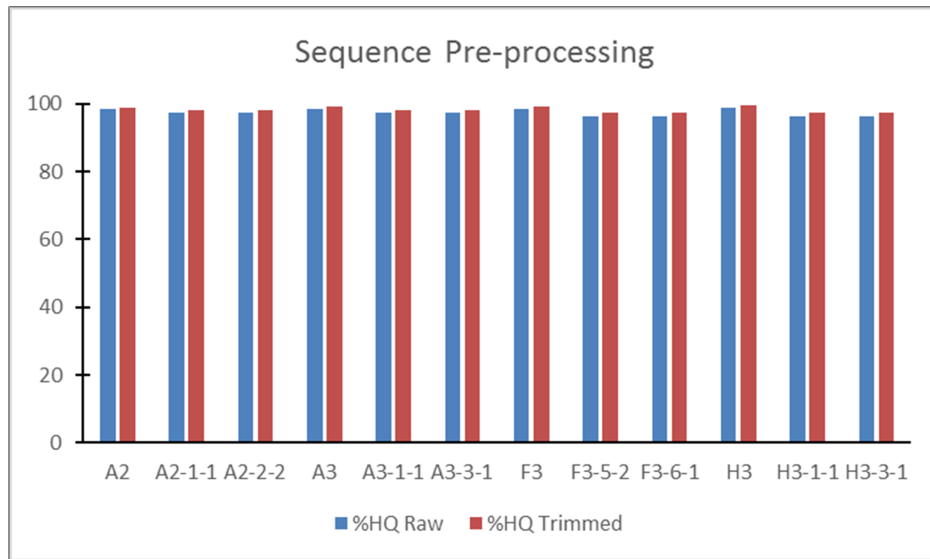

Supplement: srep37637-s1.pdf [file srep37637-s1.pdf]
